# Supplementary material for: Cajanolactone A from Cajanus cajan Promoted Osteoblast Differentiation in Human Bone Marrow Mesenchymal Stem Cells via Stimulating Wnt/LRP5/β-Catenin Signaling
Source: MDPI journal article supplement (doi:10.3390/molecules24020271), 2019-01-12
Supplement: s1 [file s1]

# Supplementary materials of compound 1

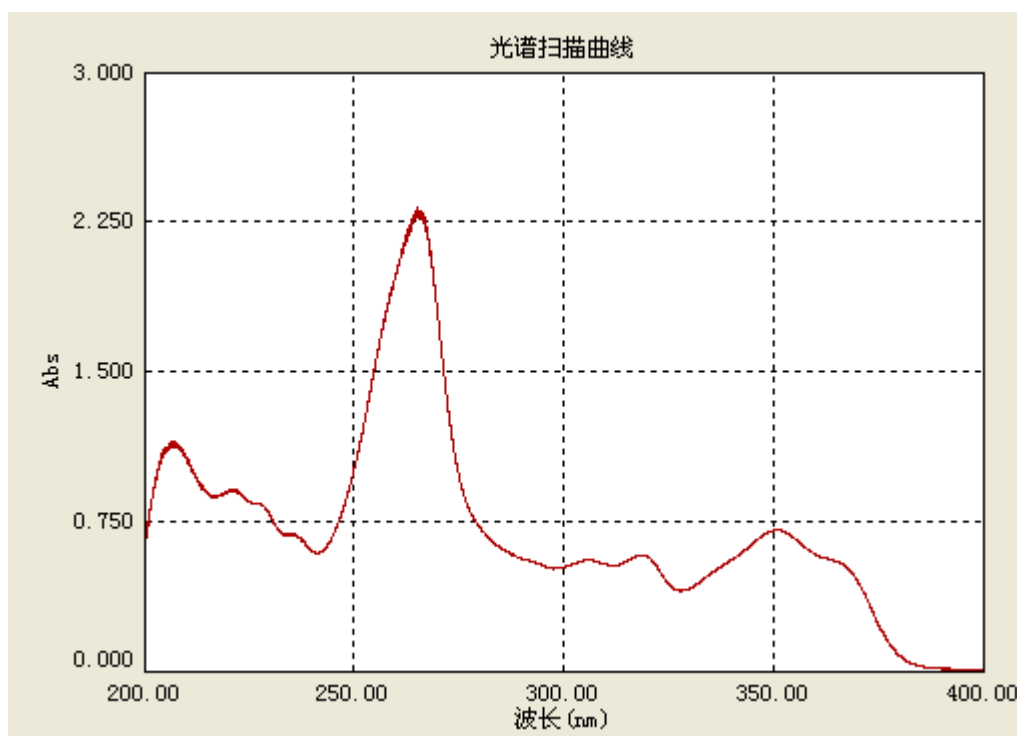

**Figure 1.** UV spectrum of 1

**Concentration:** 0.0099 mg/mL (methanol )

| $\lambda$ (nm) | Abs   |
|----------------|-------|
| 206.8          | 1.153 |
| 265.3          | 2.326 |
| 351.0          | 0.708 |

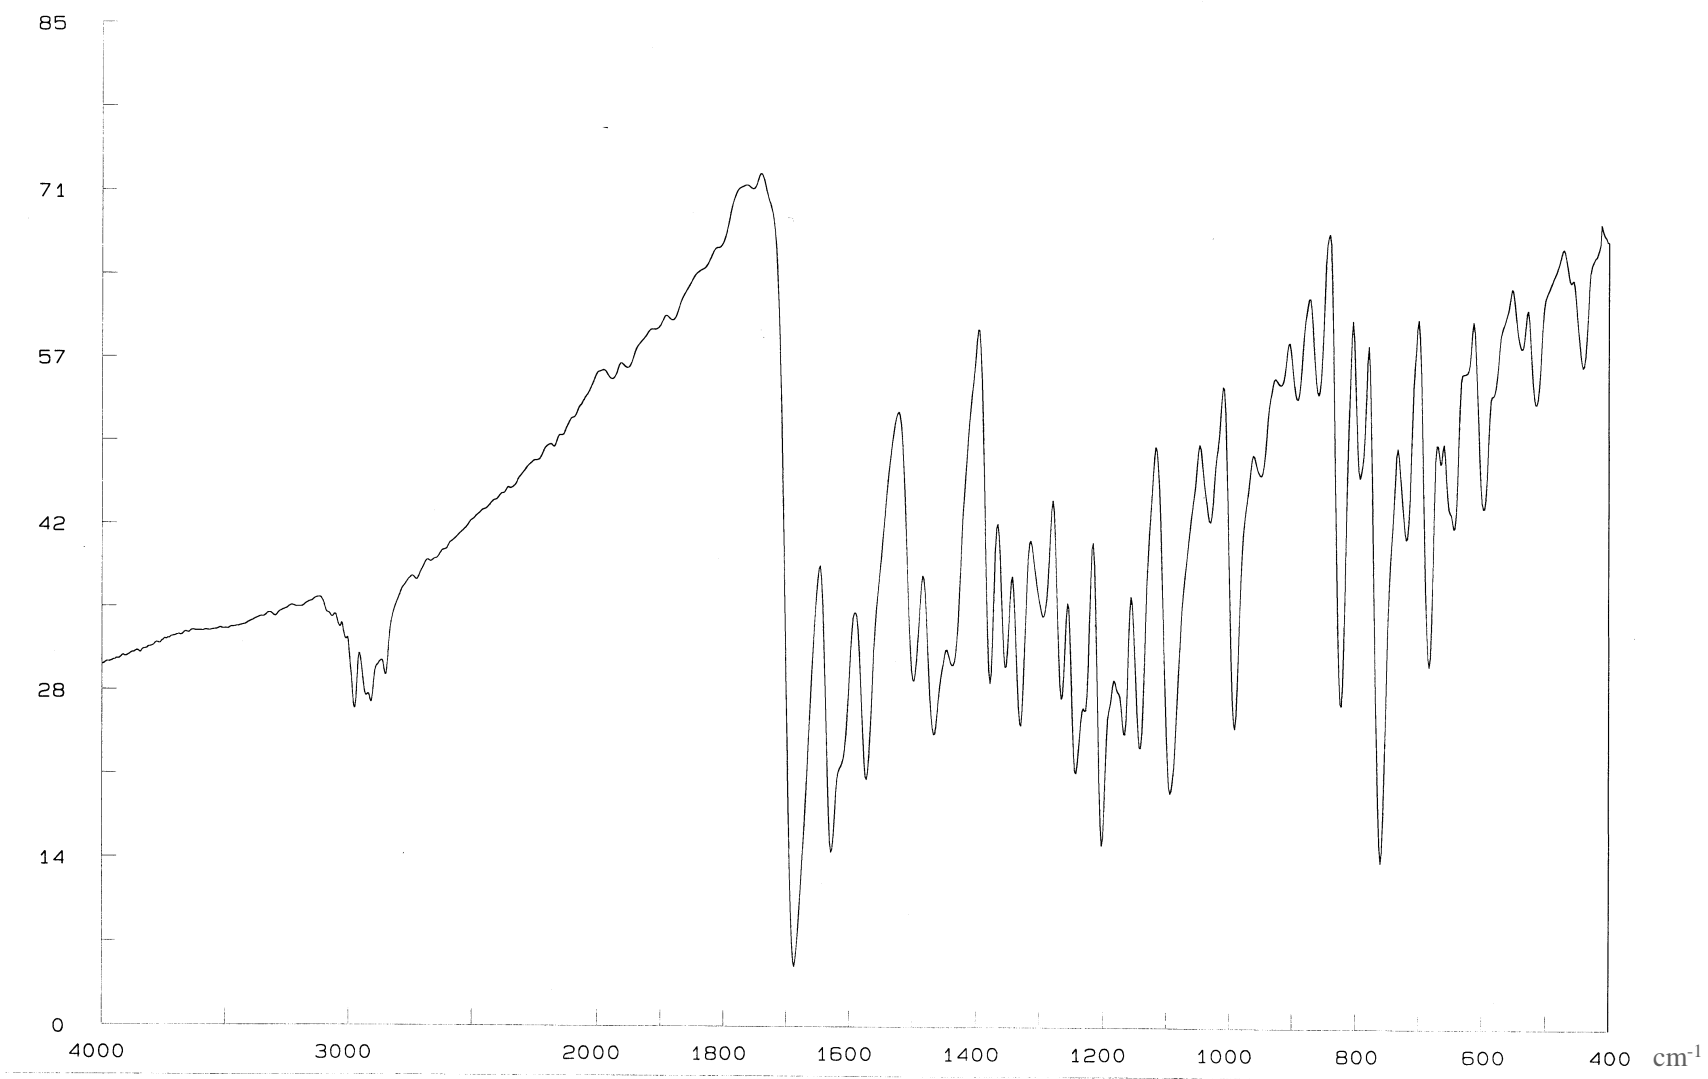

**Figure 2.** IR spectrum of **1**

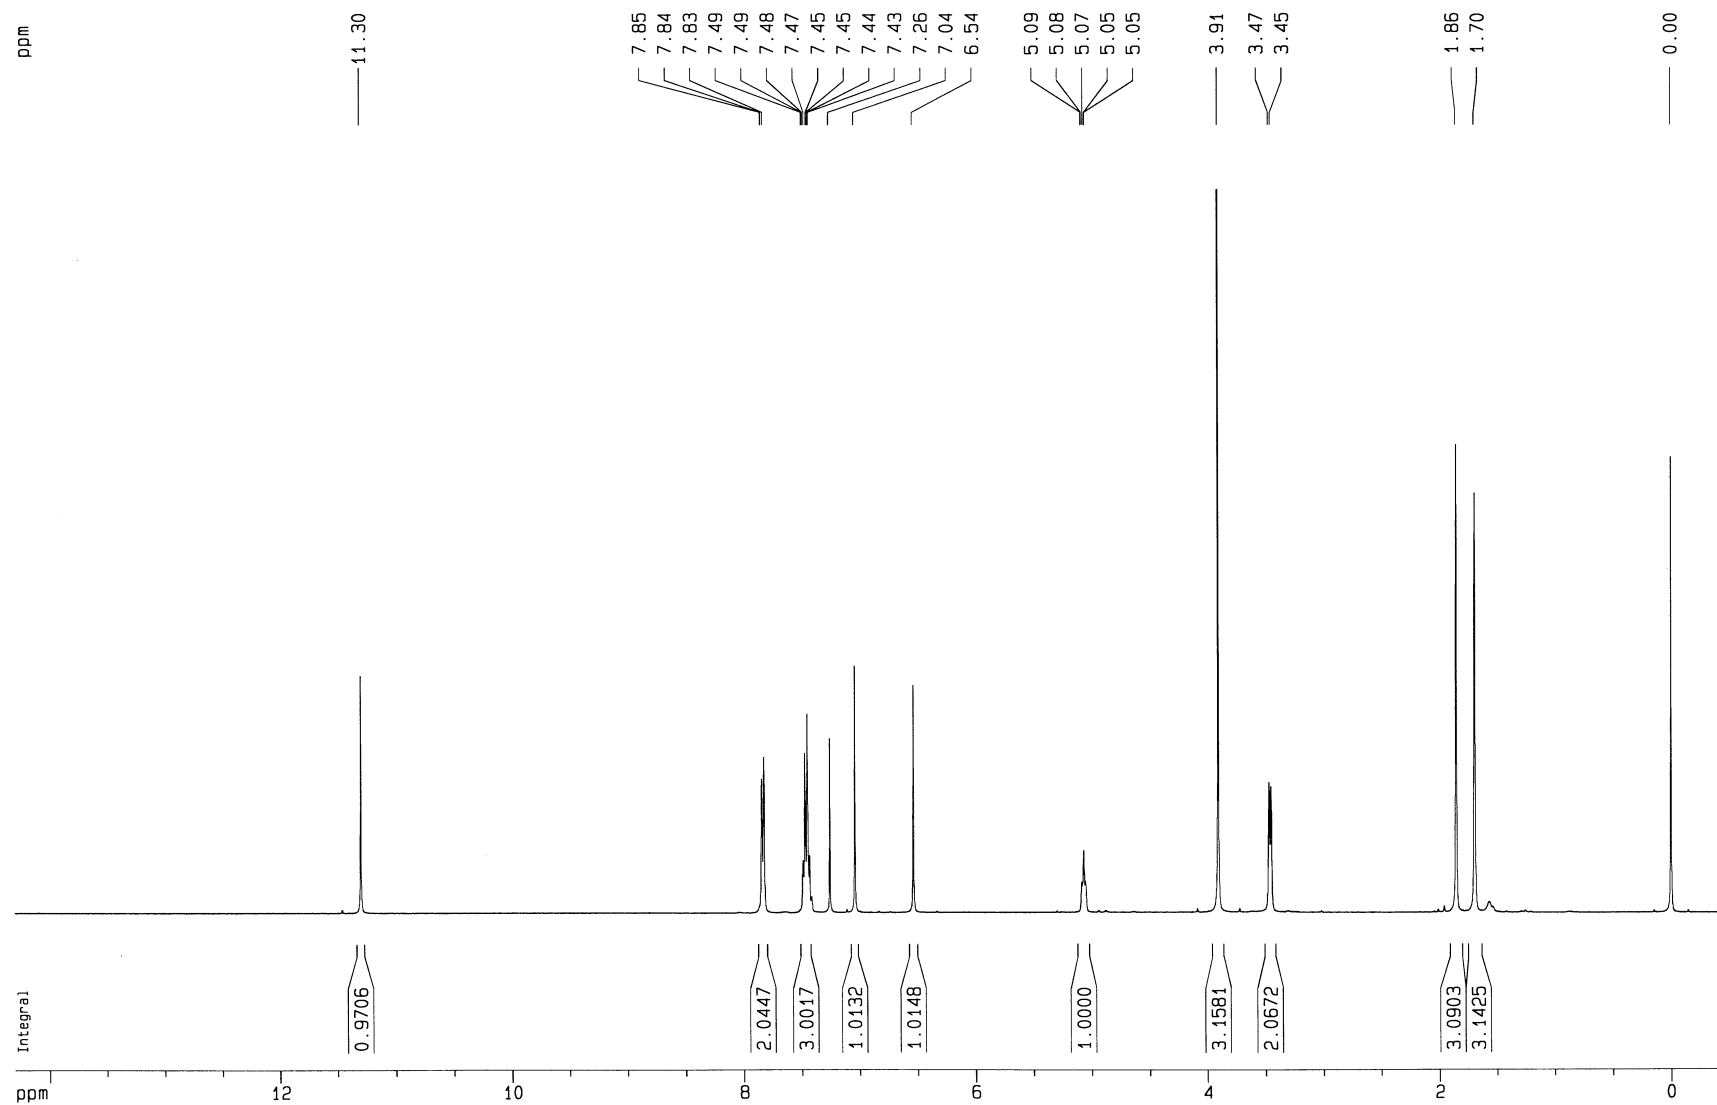

Figure 3. <sup>1</sup>H NMR spectrum of 1 (400 MHz, in CDCl<sub>3</sub>)

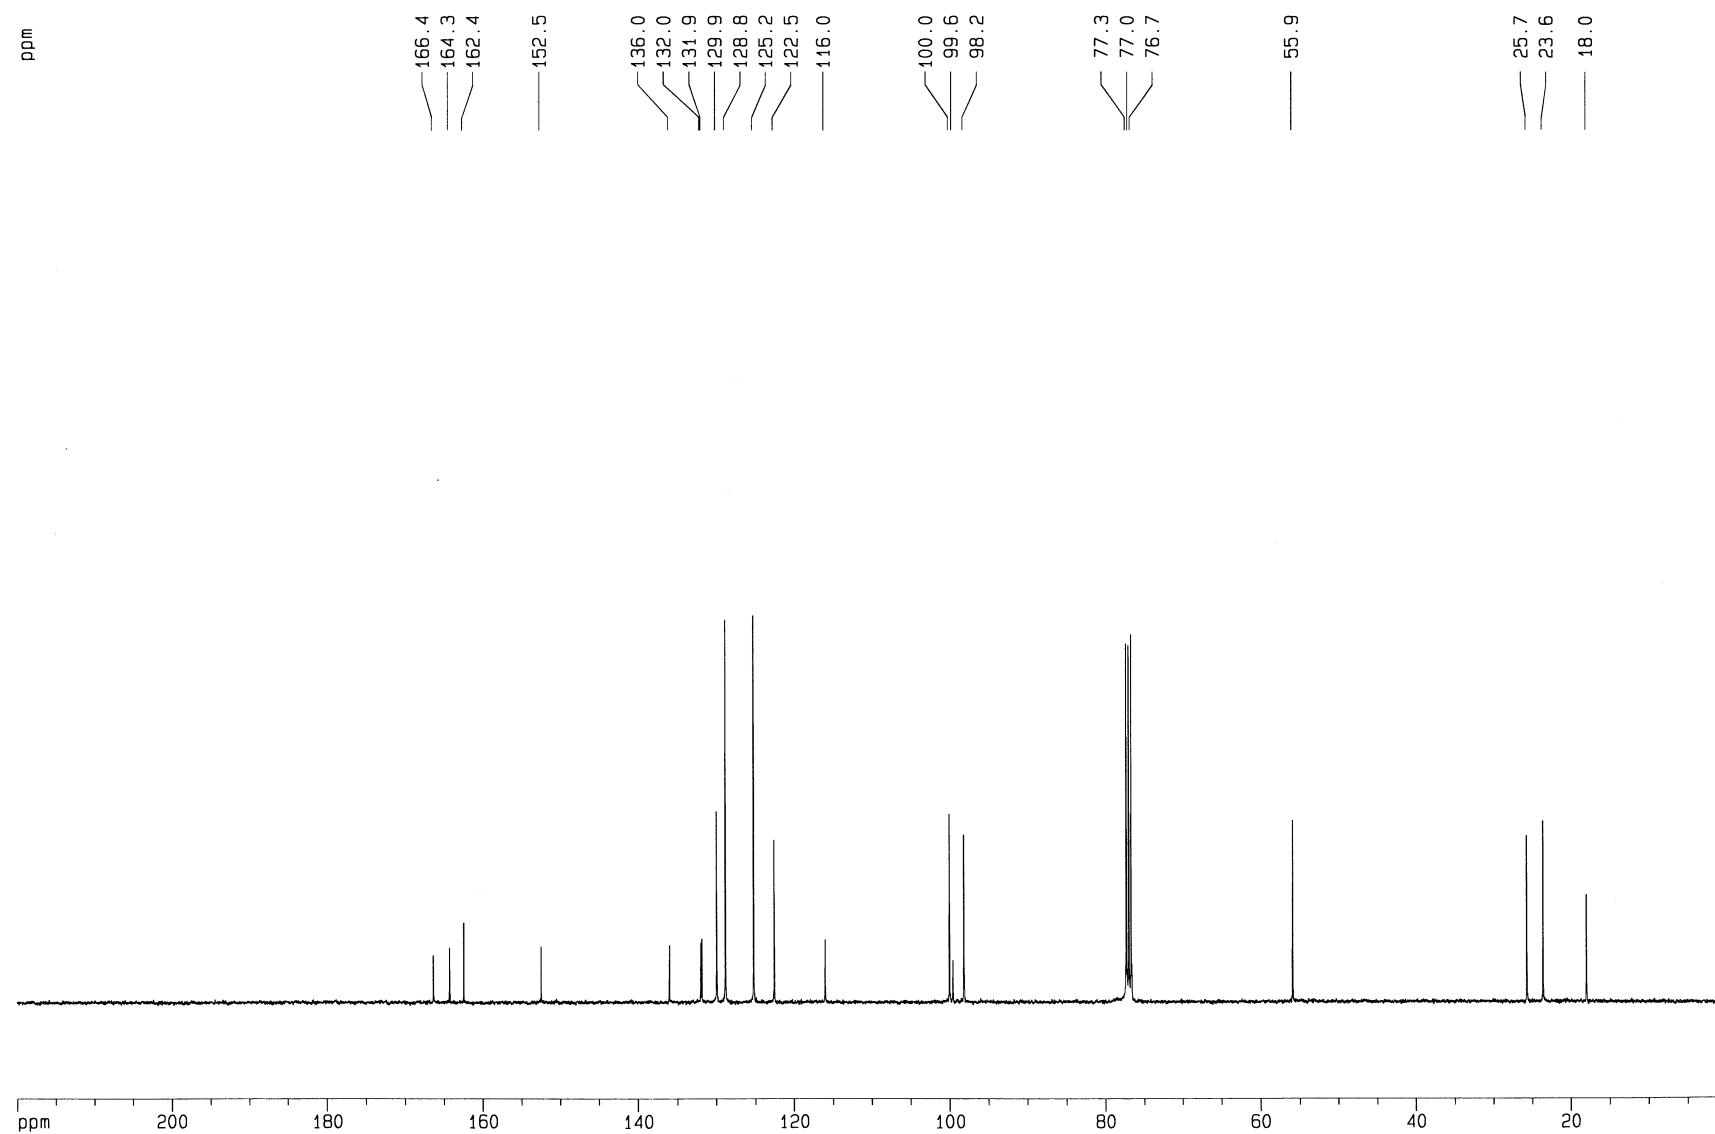

**Figure 4.** <sup>13</sup>C NMR spectrum of 1 (100 MHz, in CDCl<sub>3</sub>)

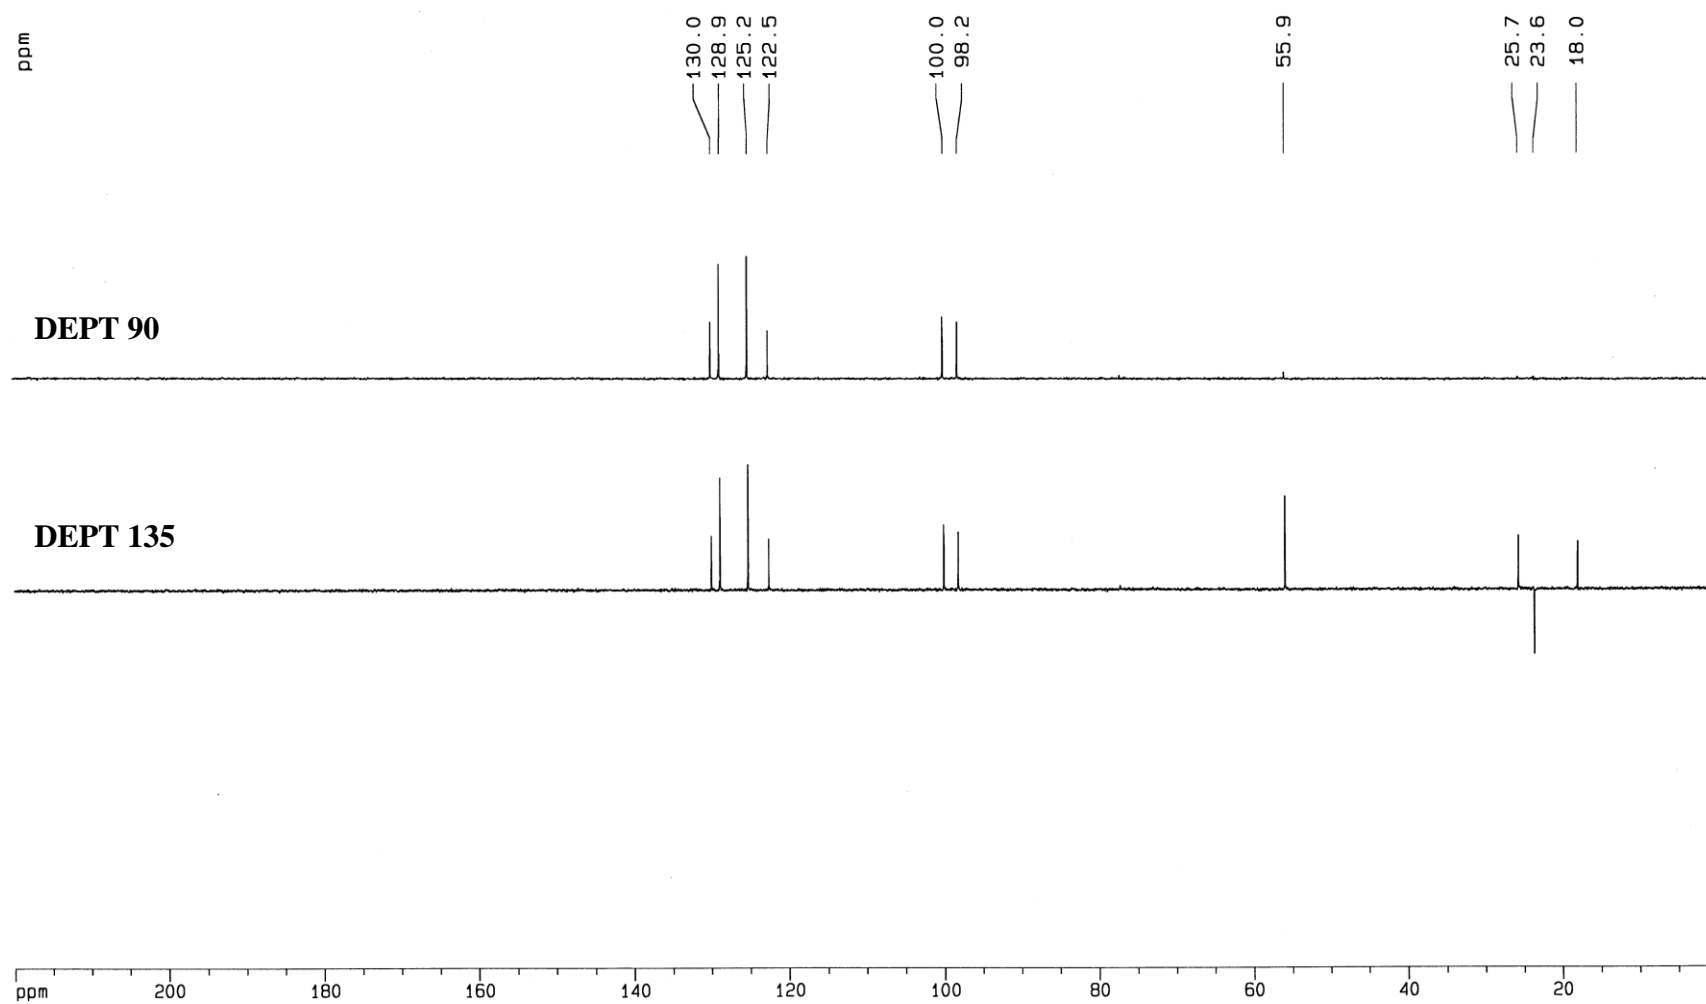

Figure 5. DEPT spectrum of 1 (100 MHz, in  $\text{CDCl}_3$ )

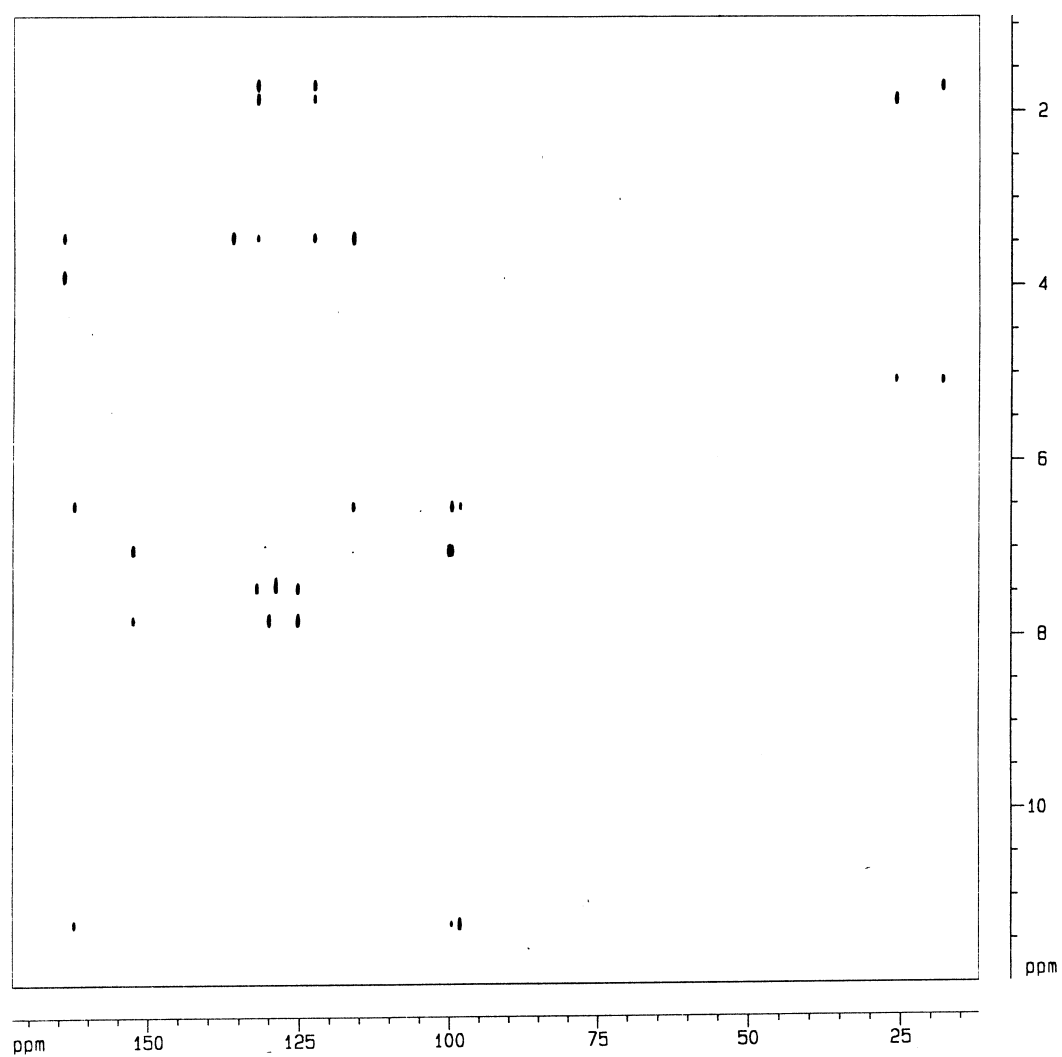

**Figure 6. HMBC spectrum of 1 (in  $\text{CDCl}_3$ )**

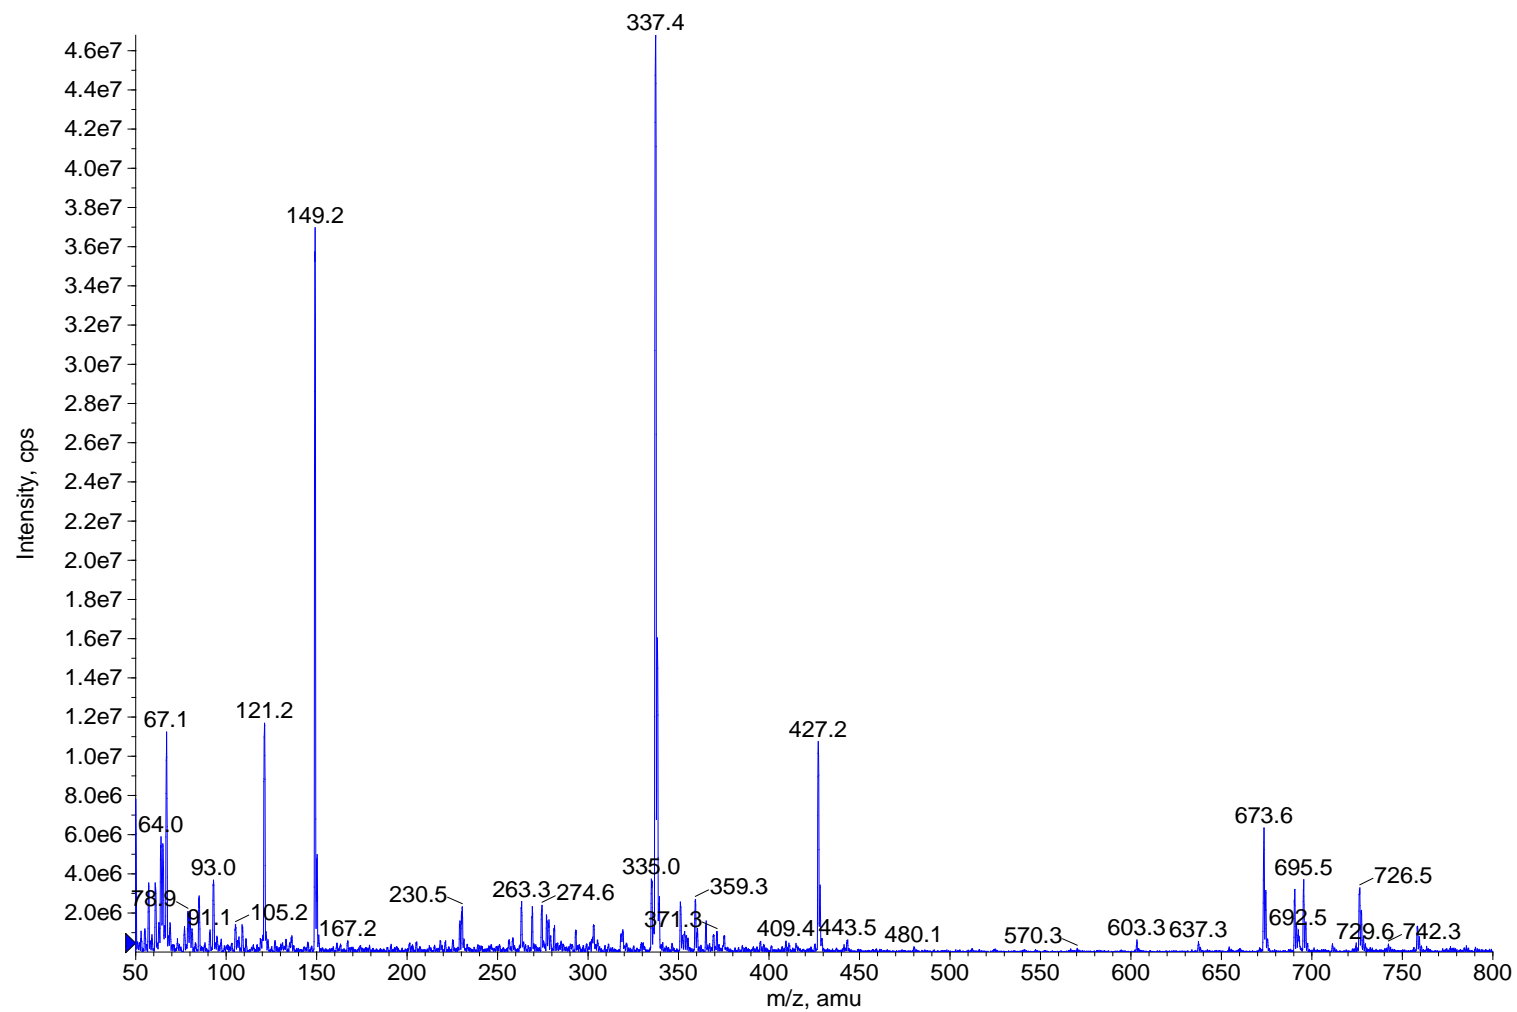

**Figure 7. ESI MS spectrum of 1**

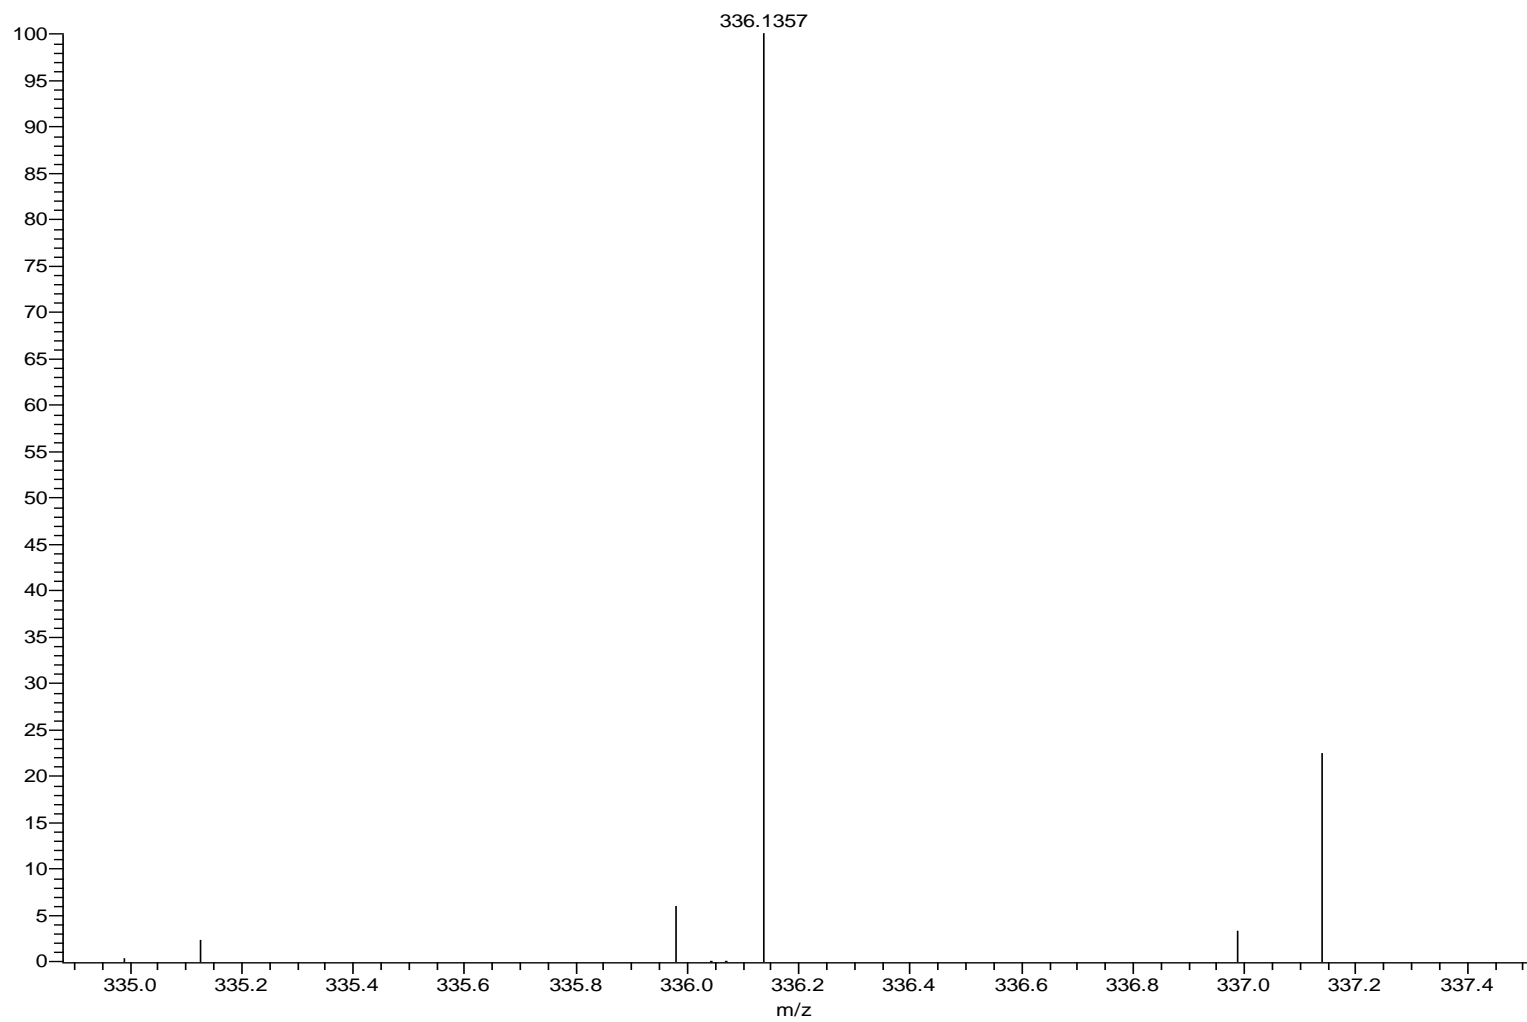

**Figure 8. HR EIMS spectrum of 1**



## Assay of 1 by HPLC

### Conditions and equipments

Chromatography was performed on an Agilent HPLC system with a VWD detector (Agilent Technologies Inc., USA). The separation was carried out on a Agilent HC-C18 (4.60 mm × 250 mm, 5 µm; Agilent Technologies Inc., USA) maintained at 25 °C, with mobile phase of methanol – water (90 : 10, v:v) and detection wavelength of 265 nm. The flow rate was set at 1.0 mL/min. Sample solution was injected 20 µL.

### Sample processing and result

Compound **1** was dissolved in methanol to afford test solution (0.1 mg/mL). The test solution was determined twice in parallel. The result was showed in Figure 9. Purity of **1** was determined as 99.0%.

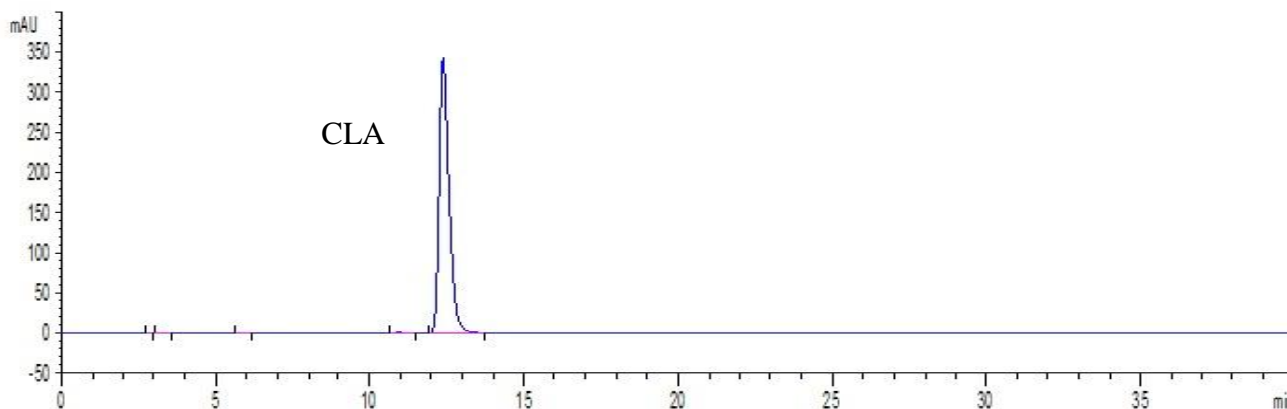

**Figure 9. HPLC chromatogram of CLA**
